# Supplementary material for: Analysis of Phosphatase Activity in a Droplet-Based Microfluidic Chip
Source: MDPI journal article supplement (doi:10.3390/bios12090740), 2022-09-08
Supplement: s1 [file s1]

## Analysis of Phosphatase Activity in a Droplet-Based Microfluidic Chip

Bala Murali Krishna Vasamsetti <sup>1,2</sup>, Yeon-Jun Kim <sup>1</sup>, Jung Hoon Kang <sup>1</sup> and Jae-Won Choi <sup>1,3,\*</sup>

<sup>1</sup> Department of Biomedical Science, Cheongju University, Cheongju 28160, Republic of Korea

<sup>2</sup> Toxicity and Risk Assessment Division, Department of Agro-Food Safety and Crop Protection, National Institute of Agricultural Sciences, Rural Development Administration, Wanju-gun 55365, Republic of Korea

<sup>3</sup> Department of Bioindustrial Engineering, Cheongju University, Cheongju 28503, Republic of Korea

\* Correspondence: jwchoi0211@gmail.com; Tel.: +82-43-229-8528

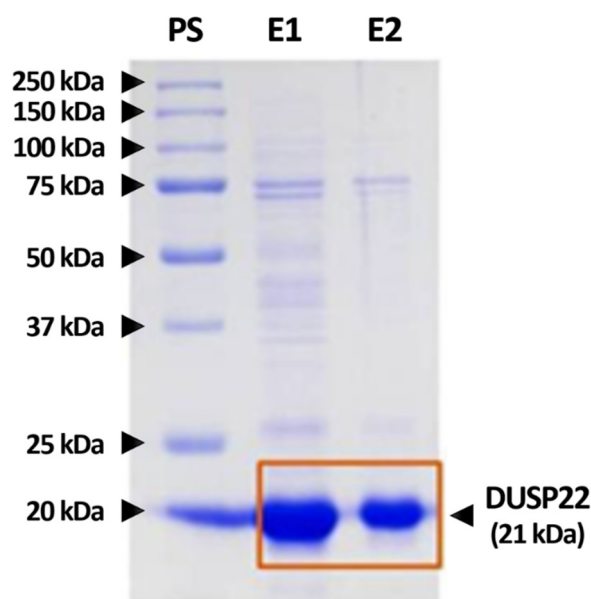

**Figure S1.** Polyacrylamide gel image confirming recombinant DUSP22 proteins. The recombinant DUSP22 proteins (6X His-tagged form) from a bacterial lysate were purified utilizing immobilized metal chromatography (IMAC) using Ni-NTA resins. Five microliter samples from the first two Ni-NTA resin packed column eluents were run on a 12% polyacrylamide gel and stained with Coomassie Brilliant Blue R-250. Lane 1: All Blue Prestained Protein Standard (PS) from Bio-Rad, Lane 2: DUSP22 elute 1 (E1), and Lane 3: DUSP22 elute 2 (E2).

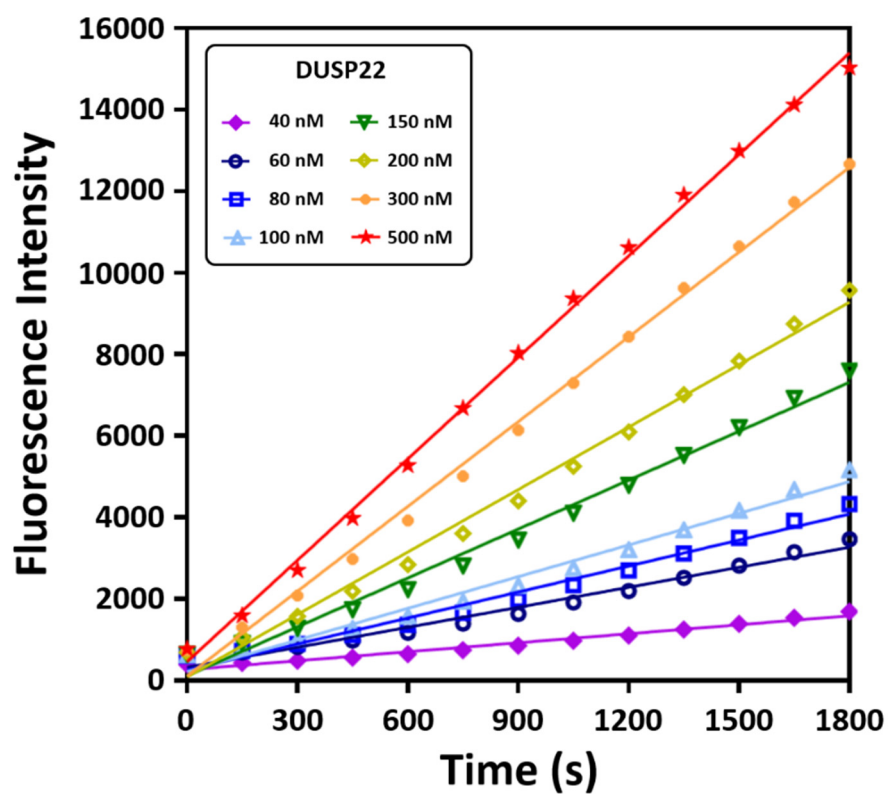

**Figure S2.** Fluorescence intensities at designated concentrations of DUSP22 in a microwell plate. The concentrations of DUSP22 were varied from 40 nM to 500 nM and the concentration of 3-OMFP was fixed at 10  $\mu$ M. All samples were excited at 488 nm and fluorescence emission from the samples was monitored at 515 nm in a black 96-well plate.
